# Supplementary material
Source: PubMed Central journal article supplement (PMC3608458)
Supplement: supp_112.050161_Supplemental_Materials_DMD050161.pdf [file supp_112.050161_Supplemental_Materials_DMD050161.pdf]

## A PBPK Model to Predict Disposition of P450 2D6 and P450 1A2 Metabolized Drugs in Pregnant Women

A.B. Ke, S.C. Nallani, P. Zhao, A. Rostami-Hodjegan, N Isoherranen, J. D. Unadkat

### Supplemental Materials

| Supple. Table 1 Theophylline PK Parameters (259 mg p.o.) during T <sub>3</sub> and Postpartum |                      |           |                    |
|-----------------------------------------------------------------------------------------------|----------------------|-----------|--------------------|
|                                                                                               | Observed             | Predicted | Predicted/Observed |
| <b>AUC<sub>0-8</sub> (mg/L•hr)</b>                                                            |                      |           |                    |
| <b>Pregnancy (T<sub>1</sub>)</b>                                                              | 94.6 <sup>[a]</sup>  | 109.9     | 1.2                |
| <b>Pregnancy (T<sub>2</sub>)</b>                                                              | 98.8 <sup>[a]</sup>  | 113.8     | 1.2                |
| <b>Pregnancy (T<sub>3</sub>)</b>                                                              | 125.5 <sup>[a]</sup> | 114.3     | 0.9                |
| <b>Postpartum (PP)</b>                                                                        | 93.6 <sup>[b]</sup>  | 87.1      | 0.9                |
| <b>AUC<sub>PP</sub>/AUC<sub>T1</sub></b>                                                      | 0.99                 | 0.79      | 0.8                |
| <b>AUC<sub>PP</sub>/AUC<sub>T2</sub></b>                                                      | 0.95                 | 0.77      | 0.8                |
| <b>AUC<sub>PP</sub>/AUC<sub>T3</sub></b>                                                      | 0.75                 | 0.76      | 1.0                |
| <b>C<sub>max</sub> (mg/L)</b>                                                                 |                      |           |                    |
| <b>Pregnancy (T<sub>1</sub>)</b>                                                              | 12.9                 | 14.6      | 1.1                |
| <b>Pregnancy (T<sub>2</sub>)</b>                                                              | 13.0                 | 14.7      | 1.1                |
| <b>Pregnancy (T<sub>3</sub>)</b>                                                              | 14.0                 | 14.3      | 1.0                |
| <b>Postpartum (PP)</b>                                                                        | 12.4                 | 13.6      | 1.1                |
| <b>C<sub>max,PP</sub>/C<sub>max,T1</sub></b>                                                  | 0.96                 | 0.93      | 1.0                |
| <b>C<sub>max,PP</sub>/C<sub>max,T2</sub></b>                                                  | 0.95                 | 0.92      | 1.0                |
| <b>C<sub>max,PP</sub>/C<sub>max,T3</sub></b>                                                  | 0.89                 | 0.95      | 1.1                |
| <b>C<sub>min,8h</sub> (mg/L)</b>                                                              |                      |           |                    |
| <b>Pregnancy (T<sub>1</sub>)</b>                                                              | 7.4                  | 7.5       | 1.0                |
| <b>Pregnancy (T<sub>2</sub>)</b>                                                              | 7.6                  | 8.0       | 1.0                |
| <b>Pregnancy (T<sub>3</sub>)</b>                                                              | 9.4                  | 8.1       | 0.9                |
| <b>Postpartum (PP)</b>                                                                        | 6.8                  | 5.4       | 0.8                |
| <b>C<sub>min,PP</sub>/C<sub>min,T1</sub></b>                                                  | 0.91                 | 0.71      | 0.8                |
| <b>C<sub>min,PP</sub>/C<sub>min,T2</sub></b>                                                  | 0.89                 | 0.67      | 0.8                |
| <b>C<sub>min,PP</sub>/C<sub>min,T3</sub></b>                                                  | 0.72                 | 0.66      | 0.9                |

<sup>[a]</sup>: AUC estimates based on observed concentration data (Gardner et al., 1987) were generated using linear trapezoidal rule

<sup>[b]</sup>: Oral clearance (CL<sub>ORAL</sub>) was found to remain suppressed during immediate postpartum period (9-13 wks PP). Therefore, AUC<sub>0-8</sub> obtained during 14-58 wks postpartum was considered to represent pre-pregnancy levels.

## Drug Metabolism and Disposition

| Supple. Table 2 Metoprolol PK Parameters (100 mg p.o.) |                       |                                             |            |
|--------------------------------------------------------|-----------------------|---------------------------------------------|------------|
| Non-pregnant Population                                |                       |                                             |            |
|                                                        | Obs.                  | Pred.                                       | Pred./Obs. |
| <b>AUC<sub>0-inf</sub> (µg/L•h)</b>                    |                       |                                             |            |
| <b>EM</b>                                              | 895.8 <sup>[a]</sup>  | 1087.1                                      | 1.2        |
| <b>PM</b>                                              | 4062.8 <sup>[a]</sup> | 4507.8                                      | 1.1        |
| <b>AUC<sub>PM</sub>/AUC<sub>EM</sub></b>               | 4.5                   | 4.1                                         | 0.9        |
| <b>AUC<sub>EM+Qd</sub>/AUC<sub>EM</sub></b>            | 3.2 <sup>[b]</sup>    | 3.3                                         | 1.0        |
| <b>C<sub>max</sub> (µg/L)</b>                          |                       |                                             |            |
| <b>EM</b>                                              | 170.9 <sup>[a]</sup>  | 158.7                                       | 0.9        |
| <b>PM</b>                                              | 427.6 <sup>[a]</sup>  | 313.7                                       | 0.7        |
| <b>C<sub>max,PM</sub>/C<sub>max,EM</sub></b>           | 2.5                   | 2.0                                         | 0.8        |
| <b>C<sub>min,12h</sub> (µg/L)</b>                      |                       |                                             |            |
| <b>EM</b>                                              | 19.2 <sup>[c]</sup>   | 26.7                                        | 1.4        |
| <b>PM</b>                                              | 133.7 <sup>[d]</sup>  | 177.6                                       | 1.3        |
| <b>C<sub>min,PM</sub>/C<sub>min,EM</sub></b>           | 7.0                   | 6.7                                         | 1.0        |
| During T <sub>3</sub> and Postpartum                   |                       |                                             |            |
|                                                        | Obs. <sup>[e]</sup>   | Pred.<br>(200% P450 2D6 Ind) <sup>[f]</sup> | Pred./Obs. |
| <b>AUC<sub>0-inf</sub> (µg/L•h)</b>                    |                       |                                             |            |
| <b>Pregnancy (T<sub>3</sub>)</b>                       | 266.9                 | 302.6                                       | 1.1        |
| <b>Postpartum (PP)</b>                                 | 952.5                 | 906.3                                       | 1.0        |
| <b>AUC<sub>PP</sub>/AUC<sub>T3</sub></b>               | 3.6                   | 3.0                                         | 0.8        |
| <b>C<sub>max</sub> (µg/L)</b>                          |                       |                                             |            |
| <b>Pregnancy (T<sub>3</sub>)</b>                       | 49                    | 51.8                                        | 1.1        |
| <b>Postpartum (PP)</b>                                 | 168                   | 142.7                                       | 0.8        |
| <b>C<sub>max,PP</sub>/C<sub>max,T3</sub></b>           | 2.4                   | 2.8                                         | 0.8        |
| <b>C<sub>min,12h</sub> (µg/L)</b>                      |                       |                                             |            |
| <b>Pregnancy (T<sub>3</sub>)</b>                       | 9.8                   | 5.9                                         | 0.6        |
| <b>Postpartum (PP)</b>                                 | 19.5                  | 21.3                                        | 1.1        |
| <b>C<sub>min,PP</sub>/C<sub>max,T3</sub></b>           | 2.0                   | 3.6                                         | 1.8        |

<sup>[a]</sup>: arithmetic mean of reported values following administration of 100mg single p.o. dose in healthy volunteers extracted from University of Washington, Metabolism & Transport Drug Interaction Database (no. of subjects =166, no. of studies=8 for the EM group and no. of subjects =20, no. of studies=3 for the PM group).

<sup>[b]</sup>: reported (Johnson and Burlew, 1996)

<sup>[c]</sup>: arithmetic mean of reported values (Hogstedt et al., 1985; Hamelin et al., 2000; Sharma et al., 2005).

<sup>[d]</sup>: arithmetic mean of reported values (Hamelin et al., 2000; Sharma et al., 2005).

<sup>[e]</sup>: arithmetic mean values reported by Hogstedt et al. (Hogstedt et al., 1985).

<sup>[f]</sup>: refers to 200% induction of P450 2D6

Drug Metabolism and Disposition

| Supple. Table 3 Paroxetine PK Parameters in Non-pregnant Population |                     |        |                |                     |        |                |
|---------------------------------------------------------------------|---------------------|--------|----------------|---------------------|--------|----------------|
| Parameters                                                          | 30 mg SD            |        |                | 30mg QD             |        |                |
|                                                                     | Obs. <sup>[a]</sup> | Pred.  | Pred./<br>Obs. | Obs. <sup>[a]</sup> | Pred.  | Pred./<br>Obs. |
| <b>AUC<sub>0-inf</sub> or AUC<sub>ss,0-tau</sub></b>                |                     |        |                |                     |        |                |
| <b>    μg/L•h</b>                                                   |                     |        |                |                     |        |                |
| <b>EM</b>                                                           | 187.3               | 154.8  | 0.8            | 893.1               | 884.2  | 1.0            |
| <b>PM</b>                                                           | 1321.7              | 1627.9 | 1.2            | 1536.6              | 1703.2 | 1.1            |
| <b>AUC<sub>PM</sub>/AUC<sub>EM</sub></b>                            | 7.1                 | 10.5   | 1.5            | 1.7                 | 1.9    | 1.1            |
| <b>C<sub>max</sub> (μg/L)</b>                                       |                     |        |                |                     |        |                |
| <b>EM</b>                                                           | 7.9                 | 9.1    | 1.2            | 52.4                | 46.9   | 0.9            |
| <b>PM</b>                                                           | 22.7                | 28.8   | 1.3            | 77.5                | 83.2   | 1.1            |
| <b>C<sub>max,PM</sub>/C<sub>max,EM</sub></b>                        | 2.9                 | 3.2    | 1.1            | 1.5                 | 1.8    | 1.2            |
| <b>C<sub>min,24h</sub> (μg/L)</b>                                   |                     |        |                |                     |        |                |
| <b>EM</b>                                                           | 2.7                 | 2.1    | 0.8            | 26.5                | 25.7   | 1.0            |
| <b>PM</b>                                                           | 14.5                | 18.9   | 1.3            | 54.2                | 56.5   | 1.0            |
| <b>C<sub>min,PM</sub>/C<sub>min,EM</sub></b>                        | 5.4                 | 9.1    | 1.7            | 2.0                 | 2.2    | 1.1            |

<sup>[a]</sup>: arithmetic mean of reported values (Sindrup et al., 1992b)

## Drug Metabolism and Disposition

| Supple. Table 4 Paroxetine $C_{ss, average}$ (20mg QD) in P450 2D6 EMs during T <sub>3</sub> and PP |                     |                                                            |             |                                             |             |
|-----------------------------------------------------------------------------------------------------|---------------------|------------------------------------------------------------|-------------|---------------------------------------------|-------------|
| $C_{ss, average}$<br>(ng/mL)                                                                        | Obs.<br>Median      | Pred. <sup>[c]</sup><br>(200% P450 2D6 Ind) <sup>[d]</sup> | Pred. /Obs. | Pred.<br>(100% P450 2D6 Ind) <sup>[d]</sup> | Pred. /Obs. |
| <b>Non-pregnant</b>                                                                                 | 18.4 <sup>[a]</sup> | 18.1                                                       | 1.0         | 18.1                                        | 1.0         |
| <b>Pregnancy (T<sub>3</sub>)</b>                                                                    | 5.0 <sup>[b]</sup>  | 2.5                                                        | 0.5         | 4.4                                         | 0.9         |
| <b><math>C_{ss}</math> ratio (PP:T<sub>3</sub>)</b>                                                 | 3.7                 | 7.1                                                        | 1.9         | 4.1                                         | 1.1         |

<sup>[a]</sup> The concentrations measured 12 hours ( $\tau/2$ ) after dosing were taken as an approximation to mean  $C_{ss}$  (Sindrup et al., 1992a).

<sup>[b]</sup> Reported median values (Ververs et al., 2009). Time between drug intake and sample collection varied.

<sup>[c]</sup> Predicted concentration at  $\tau/2$  was taken as an approximation to mean  $C_{ss}$ .

<sup>[d]</sup> Refers to 200% induction and 100% induction of P450 2D6.

## Drug Metabolism and Disposition

| Supple. Table 5 Dextromethorphan PK Parameters (30 mg p.o.)<br>in Non-pregnant Population |                       |        |                |
|-------------------------------------------------------------------------------------------|-----------------------|--------|----------------|
|                                                                                           | Obs.                  | Pred.  | Pred./<br>Obs. |
| <b>AUC<sub>0-inf</sub> (µg/L•h)</b>                                                       |                       |        |                |
| <b>EM</b>                                                                                 | 16.9 <sup>[a]</sup>   | 16.3   | 1.0            |
| <b>PM</b>                                                                                 | 1241.6 <sup>[b]</sup> | 1058.8 | 0.9            |
| <b>EM+Qd</b>                                                                              | 350.8 <sup>[c]</sup>  | 258.7  | 0.7            |
| <b>AUC<sub>PM</sub>/AUC<sub>EM</sub></b>                                                  | 73.5                  | 65.0   | 0.9            |
| <b>AUC<sub>EM+Qd</sub>/AUC<sub>EM</sub></b>                                               | 20.8                  | 15.9   | 0.8            |
| <b>C<sub>max</sub> (µg/L)</b>                                                             |                       |        |                |
| <b>EM</b>                                                                                 | 2.0 <sup>[a]</sup>    | 1.8    | 0.9            |
| <b>PM</b>                                                                                 | 23.1 <sup>[b]</sup>   | 29.7   | 1.29           |
| <b>EM+Qd</b>                                                                              | 19.5 <sup>[c]</sup>   | 21.0   | 1.1            |
| <b>C<sub>max,PM</sub>/C<sub>max,EM</sub></b>                                              | 12.1                  | 16.5   | 1.4            |
| <b>C<sub>max,EM+Qd</sub>/C<sub>max,EM</sub></b>                                           | 10.2                  | 11.6   | 1.1            |
| <b>C<sub>min,48h</sub> (µg/L)</b>                                                         |                       |        |                |
| <b>EM</b>                                                                                 | 0.2 <sup>[a]</sup>    | 0.04   | 0.2            |
| <b>PM</b>                                                                                 | 10.7 <sup>[b]</sup>   | 8.94   | 0.8            |
| <b>EM+Qd</b>                                                                              | 2.0 <sup>[c]</sup>    | 0.9    | 0.5            |
| <b>C<sub>min,PM</sub>/C<sub>min,EM</sub></b>                                              | 58.9                  | 223.5  | 3.8            |
| <b>C<sub>min,EM+Qd</sub>/C<sub>min,EM</sub></b>                                           | 11.0                  | 22.5   | 2.0            |

<sup>[a]</sup>: Weighted arithmetic mean of reported values following administration of 30 mg single p.o. dose (Capon et al., 1996; Abdul Manap et al., 1999; Gorski et al., 2004; Abduljalil et al., 2010)

<sup>[b]</sup>: Weighted arithmetic mean of reported values following administration of 30 mg single p.o. dose (Capon et al., 1996; Gorski et al., 2004)

<sup>[c]</sup>: Weighted arithmetic mean of reported values following administration of 30 mg single p.o. dose (Capon et al., 1996; Abdul Manap et al., 1999)

## Drug Metabolism and Disposition

| Supple. Table 6                               |                            | DEX UR in 2D6 EMs during T <sub>3</sub> and Postpartum |            |                              |            |
|-----------------------------------------------|----------------------------|--------------------------------------------------------|------------|------------------------------|------------|
| <b>UR<sub>0-24h</sub></b><br><b>(DEX/DXO)</b> | Obs. <sup>[a]</sup>        | Pred.<br>(200% P450 2D6 Ind)                           | Pred./Obs. | Pred.<br>(100% P450 2D6 Ind) | Pred./Obs. |
| <b>Pregnancy (T<sub>3</sub>)</b>              | 0.0033<br>(0.00147-0.0086) | 0.0023                                                 | 0.7        | 0.0034                       | 1.0        |
| <b>Postpartum (PP)</b>                        | 0.0063<br>(0.0037-0.026)   | 0.0065                                                 | 1.0        | 0.0065                       | 1.0        |
| <b>UR<sub>PP</sub>/UR<sub>T3</sub></b>        | 1.9                        | 2.9                                                    | 1.5        | 1.9                          | 1.0        |

<sup>[a]</sup>: Reported median (90% CI) following the administration of 30 mg single p.o. dose (Tracy et al., 2005)

## Drug Metabolism and Disposition

| Supple. Table 7 Clonidine PK Parameters in Non-pregnant Population |                     |       |                |
|--------------------------------------------------------------------|---------------------|-------|----------------|
|                                                                    | Obs.                | Pred. | Pred./<br>Obs. |
| <b>AUC<sub>0-inf</sub> (µg/L•h)</b>                                |                     |       |                |
| <b>2.35 µg/Kg i.v.</b>                                             | 11.3 <sup>[a]</sup> | 12.5  | 1.1            |
| <b>1.79 µg/Kg i.v.</b>                                             | 8.1 <sup>[a]</sup>  | 9.5   | 1.2            |
| <b>C<sub>min, 24h</sub> (µg/L)</b>                                 |                     |       |                |
| <b>2.35 µg/Kg i.v.</b>                                             | 0.35 <sup>[a]</sup> | 0.156 | 0.4            |
| <b>1.79 µg/Kg i.v.</b>                                             | 0.12 <sup>[a]</sup> | 0.12  | 1.0            |
| <b>AUC<sub>0-inf</sub> (µg/L•h)</b>                                |                     |       |                |
| <b>0.1 mg p.o.</b>                                                 | 7.3 <sup>[b]</sup>  | 6.3   | 0.9            |
| <b>0.2 mg p.o.</b>                                                 | 14.3 <sup>[c]</sup> | 12.5  | 0.9            |
| <b>0.3 mg p.o.</b>                                                 | 21.5 <sup>[d]</sup> | 18.8  | 0.9            |
| <b>C<sub>max</sub> (µg/L)</b>                                      |                     |       |                |
| <b>0.1 mg p.o.</b>                                                 | 0.44 <sup>[b]</sup> | 0.44  | 1.0            |
| <b>0.2 mg p.o.</b>                                                 | 0.88 <sup>[c]</sup> | 0.88  | 1.0            |
| <b>0.3 mg p.o.</b>                                                 | 1.4 <sup>[d]</sup>  | 1.32  | 0.9            |
| <b>C<sub>min, 24h</sub> (µg/L)</b>                                 |                     |       |                |
| <b>0.1 mg p.o.</b>                                                 | 0.1 <sup>[b]</sup>  | 0.08  | 0.8            |
| <b>0.2 mg p.o.</b>                                                 | -                   | 0.16  | -              |
| <b>0.3 mg p.o.</b>                                                 | 0.3 <sup>[d]</sup>  | 0.25  | 0.8            |

<sup>[a]</sup>: reported mean values (Frisk-Holmberg et al., 1981)

<sup>[b]</sup>: reported mean values extracted from product label for CATAPRES® (Clonidine Hydrochloride) oral tablet.

<sup>[c]</sup>: reported mean values (Porchet et al., 1992)

<sup>[d]</sup>: reported mean values (Cunningham et al., 1994)

## Drug Metabolism and Disposition

| Supple. Table 8 Clonidine PK Parameters during T <sub>3</sub> and Postpartum |                     |                              |            |                              |            |
|------------------------------------------------------------------------------|---------------------|------------------------------|------------|------------------------------|------------|
|                                                                              | Obs. <sup>[a]</sup> | Pred.<br>(200% P450 2D6 Ind) | Pred./Obs. | Pred.<br>(100% P450 2D6 Ind) | Pred./Obs. |
| <b>AUC<sub>0-tau</sub> (µg/L•hr)</b>                                         |                     |                              |            |                              |            |
| <b>Pregnancy (T<sub>3</sub>)</b>                                             | 5.7                 | 4.8                          | 0.8        | 5.8                          | 1.0        |
| <b>Postpartum (PP)</b>                                                       | 9.6                 | 10.4                         | 1.1        | 10.4                         | 1.1        |
| <b>AUC<sub>PP</sub>/AUC<sub>T3</sub></b>                                     | 1.7                 | 2.2                          | 1.3        | 1.8                          | 1.1        |
| <b>C<sub>max</sub> (µg/L)</b>                                                |                     |                              |            |                              |            |
| <b>Pregnancy (T<sub>3</sub>)</b>                                             | 0.57                | 0.61                         | 1.1        | 0.7                          | 1.2        |
| <b>Postpartum (PP)</b>                                                       | -                   | 1.18                         | -          | 1.18                         | -          |
| <b>C<sub>max,PP</sub>/C<sub>max,T3</sub></b>                                 | -                   | 1.9                          | -          | 1.7                          | -          |

<sup>[a]</sup> Observed value calculated based on reported CL<sub>ORAL</sub> and assumed mean dose of 0.15 mg (dose range: 0.15-0.3 mg per day) (Buchanan et al., 2009).
